# Supplementary material
Source: HighWire-hosted journal article supplement (https://oem.bmj.com/content/76/5/317)
Supplement: inline-supplementary-material-1 [file inline-supplementary-material-1.pdf]

## SUPPLEMENTAL FIGURES

### History of cataract (A, B, C)

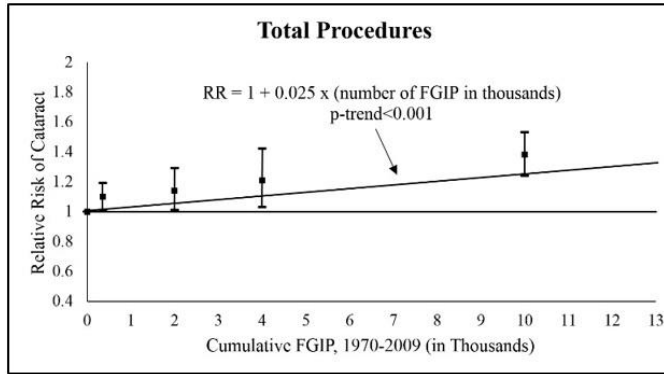

(A)

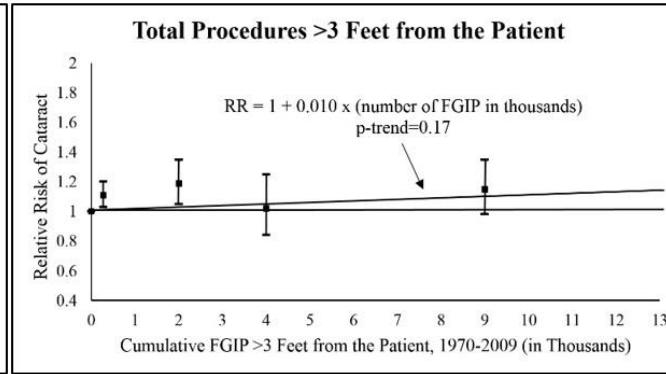

(B)

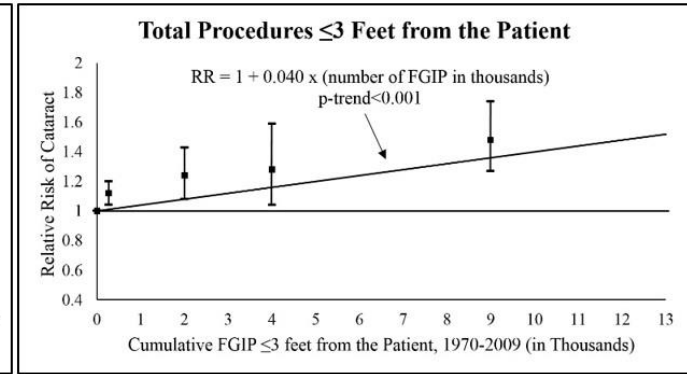

(C)

### History of cataract surgery (D, E, F)

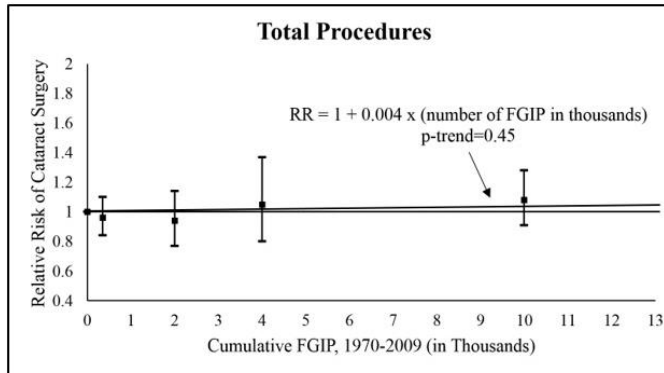

(D)

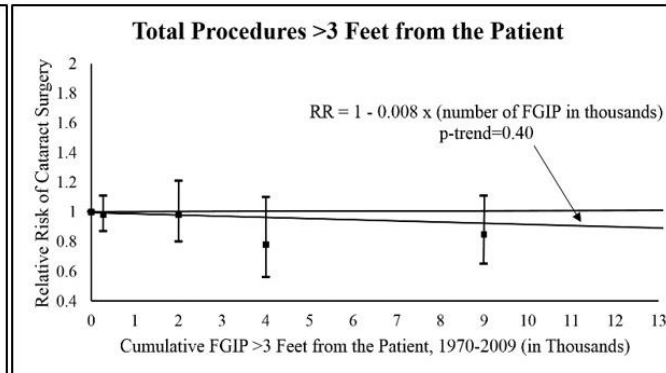

(E)

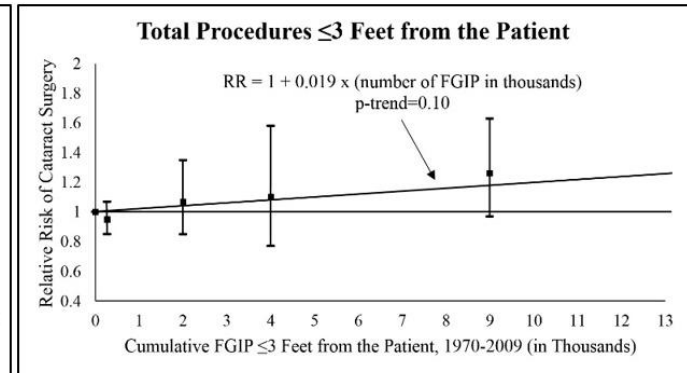

(F)

### Supplemental Figure 1 FGIP work history and cataract and cataract surgery risk, United States Radiologic Technologists Study, 1994-2014, (N=35,751)

Shown are relative risks and 95% confidence intervals for cataract and cataract surgery risk (1994-2014) plotted at the mean number of procedures for each category. Cumulative number of fluoroscopically-guided interventional procedures (FGIP) from 1970-2009 was categorized as never worked with FGIP (referent), 0-<1,000, 1,000-<3,000, 3,000-<5,000, ≥5,000. The slope of the lines represents the excess relative risk (RR-1) per 1,000 FGIP. Relative risks and excess relative risks are adjusted for attained age and sex. (A) shows cumulative FGIP and cataract risk, (B) shows cumulative FGIP >3 feet from the patient and cataract risk, (C) shows cumulative FGIP ≤3 feet from the patient and cataract risk, (D) shows cumulative FGIP and cataract surgery risk, (E) shows cumulative FGIP >3 feet from the patient and cataract surgery risk, (F) shows cumulative FGIP ≤3 feet from the patient and cataract surgery risk

**SUPPLEMENTAL TABLES**

**Supplemental Table 1 Classifications used for FGIP categories**

| <b>Category</b>                                                 | <b>Procedures</b>                                                  | <b>References</b>                                                                      |
|-----------------------------------------------------------------|--------------------------------------------------------------------|----------------------------------------------------------------------------------------|
| <b>Low-dose (&lt;10,000 cGy·cm<sup>2</sup> DRL)<sup>c</sup></b> | Diagnostic electrophysiology (EP) studies <sup>a</sup>             | Padovani 2008 <sup>1</sup>                                                             |
|                                                                 | Electrophysiology (EP) ablations                                   | Efstathopoulos 2006 <sup>2</sup> ; Padovani 2008 <sup>1</sup>                          |
|                                                                 | Peripherally inserted central catheter (PICC) placement            | Heilmaier 2015 <sup>3</sup> ; Heilmaier 2017 <sup>4</sup>                              |
|                                                                 | Port placement                                                     | Fletcher 2002 <sup>5</sup> ; Dauer 2009 <sup>6</sup>                                   |
|                                                                 | Inferior vena cava (IVC) filter placement                          | Heilmaier 2015 <sup>3</sup>                                                            |
|                                                                 | Endoscopic retrograde cholangiopancreatography (ERCP)              | Buls 2002 <sup>7</sup>                                                                 |
|                                                                 | Orthopedic extremity nailing                                       | Kirousis 2009 <sup>8</sup> ; Pillai 2004 <sup>9</sup>                                  |
| <b>High-dose (≥10,000 cGy·cm<sup>2</sup> DRL)<sup>c</sup></b>   | Diagnostic cardiovascular catheterizations <sup>a,b</sup>          | Tsapaki 2003 <sup>10</sup> ; Neofotisou 2003 <sup>11</sup> ; Miller 2012 <sup>12</sup> |
|                                                                 | Diagnostic neuroangiography <sup>a</sup>                           | Vano 2008 <sup>13</sup> ; Ihn 2016 <sup>14</sup>                                       |
|                                                                 | Percutaneous coronary interventions (PCI)                          | Balter 2008 <sup>15</sup> ; Miller 2012 <sup>12</sup>                                  |
|                                                                 | Pacemaker or intracardiac defibrillator implantations <sup>b</sup> | Tsapaki 2011 <sup>16</sup> ; Simantirakis 2013 <sup>17</sup>                           |
|                                                                 | Embolizations                                                      | Miller 2003 <sup>18</sup> ; Miller 2009 <sup>19</sup>                                  |
|                                                                 | Endovascular therapeutic procedures                                | Kemerink 2002 <sup>20</sup> ; Chun 2014 <sup>21</sup>                                  |
|                                                                 | Dialysis interventions <sup>b</sup>                                | Vano 2009 <sup>22</sup> ; Heye 2012 <sup>23</sup>                                      |
|                                                                 | Peripheral vascular interventions                                  | Vano 2008 <sup>13</sup>                                                                |
|                                                                 | Transjugular intrahepatic portosystemic shunts (TIPS)              | Miller 2003 <sup>18</sup> ; Miller 2009 <sup>19</sup>                                  |
|                                                                 | Aortic stent grafts                                                | Kuhelj 2010 <sup>24</sup>                                                              |
|                                                                 | Percutaneous nephrolithotomy (PCNL) <sup>b</sup>                   | Miller 2009 <sup>19</sup>                                                              |
|                                                                 | Nephrostomy <sup>b</sup>                                           | Vano 2008 <sup>13</sup> ; Miller 2009 <sup>19</sup>                                    |
|                                                                 | Biliary tract procedures <sup>b</sup>                              | Miller 2009 <sup>19</sup> ; Ruiz-Cruces 2016 <sup>25</sup>                             |
|                                                                 | Vertebroplasty                                                     | Miller 2009 <sup>19</sup> ; Etard 2017 <sup>26</sup>                                   |

Abbreviations: FGIP- fluoroscopically-guided interventional procedures, cGy- centigray, DRL- dose reference limit

<sup>a</sup> “Diagnostic” in the procedure name indicates a diagnostic procedure. All other procedures examined were categorized as therapeutic.

<sup>b</sup> The procedure was reclassified from low-dose to high-dose as it was determined that the radiologic technologist would be positioned close to the patient during the procedure.

<sup>c</sup> DRL values do not represent a dose to any individual or a recognized demarcation between exposure levels

**Supplemental Table 2 Excess Relative Risk of cataract per 1,000 FGIP for exposure lags and exposure-time windows, United States Radiologic Technologists Study, 1994-2014, (N=35,751)**

| Exposure lag (Univariate analyses)                  | Cumulative FGIP (1970-2009) |              |          |                      |
|-----------------------------------------------------|-----------------------------|--------------|----------|----------------------|
|                                                     | ERR <sup>a</sup>            | 95% CI       | Deviance | p-value <sup>b</sup> |
| 0-year lag                                          | 0.017                       | 0.010-0.025  | 23,548   | <0.001               |
| 5-year lag                                          | 0.020                       | 0.012-0.029  | 23,545   | <0.001               |
| 10-year lag                                         | 0.025                       | 0.015-0.035  | 23,542   | <0.001               |
| <b>Exposure-time window (Multivariate analysis)</b> |                             |              |          |                      |
| 0-<5 years <sup>c</sup>                             | -0.066                      | -0.123-0.033 | 23,541   | 0.25                 |
| 5-<10 years <sup>d</sup>                            | 0.087                       | -0.062-0.075 | 23,539   | >0.50                |
| ≥10 years <sup>e</sup>                              | 0.029                       | 0.016-0.041  | 23,563   | < 0.001              |

Abbreviations: ERR-excess relative risk, CI-confidence interval

<sup>a</sup> Adjusted for attained age and sex in a person-year table categorized as 0, 500, 1000-10,000 [intervals of 1,000 procedures], 10,000+

<sup>b</sup> Based on the likelihood ratio test for the continuous term to calculate the ERR for FGIP work history excluded using each lag model

<sup>c</sup> Defined as the 0-5 years before the time at risk since last worked with FGIP

<sup>d</sup> Defined as the 5-10 years before the time at risk

<sup>e</sup> Defined as ≥10 years before the time at risk

**Supplemental Table 3 Excess Relative Risk (ERR) of cataract per 1,000 FGIP, United States Radiologic Technologists Study, 1994-2014,  
(N=35,751)**

| Cumulative FGIP (1970-2009)           | Total procedures |                     | Procedures >3 feet from the patient |                     | Procedures ≤3 feet from the patient |                     |
|---------------------------------------|------------------|---------------------|-------------------------------------|---------------------|-------------------------------------|---------------------|
|                                       | ERR <sup>a</sup> | 95% CI <sup>l</sup> | ERR <sup>a,b</sup>                  | 95% CI <sup>l</sup> | ERR <sup>a,c</sup>                  | 95% CI <sup>l</sup> |
| <b>Any FGIP</b>                       | 0.025            | 0.015-0.035         | 0.010                               | -0.0040-0.027       | 0.040                               | 0.022-0.060         |
| <b>Diagnostic FGIP<sup>d,h</sup></b>  | 0.031            | 0.013-0.051         | 0.020                               | -0.007-0.053        | 0.040                               | 0.012-0.074         |
| <b>Therapeutic FGIP<sup>e,i</sup></b> | 0.019            | 0.003-0.036         | 0.004                               | -0.018-0.030        | 0.040                               | 0.009-0.074         |
| <b>Low-dose FGIP<sup>f,j</sup></b>    | 0.023            | -0.009-0.057        | 0.025                               | -0.020-0.077        | 0.024                               | -0.037-0.092        |
| <b>High-dose FGIP<sup>g,k</sup></b>   | 0.025            | 0.012-0.040         | 0.006                               | -0.013-0.029        | 0.045                               | 0.021-0.071         |

Abbreviations: FGIP- fluoroscopically-guided interventional procedures, ERR-excess relative risk, CI-confidence interval

<sup>a</sup> Adjusted for attained age and sex in a person-year table categorized as 0, 500, 1000-10,000 [intervals of 1,000 procedures], 10,000+

<sup>b</sup> Adjusted for cumulative procedures ≤3 feet

<sup>c</sup> Adjusted for cumulative procedures >3 feet

<sup>d</sup> Adjusted for cumulative therapeutic FGIP work history

<sup>e</sup> Adjusted for cumulative diagnostic FGIP work history

<sup>f</sup> Adjusted for cumulative high-dose FGIP work history

<sup>g</sup> Adjusted for cumulative low-dose FGIP work history

<sup>h</sup> Diagnostic FGIP includes electrophysiology diagnostic studies, diagnostic cardiovascular catheterizations, and diagnostic neuroangiography

<sup>i</sup> Therapeutic FGIP includes electrophysiology ablations, peripherally inserted central catheter placement, port placement, inferior vena cava filter placement, endoscopic retrograde cholangiopancreatography, orthopedic extremity nailing, percutaneous coronary interventions, pacemaker or intracardiac defibrillator implantations, embolizations, endovascular therapeutic procedures, dialysis interventions, peripheral vascular interventions, transjugular intrahepatic portosystemic shunts, aortic stent grafts, percutaneous nephrolithotomy, nephrostomy, biliary tract procedures, and vertebroplasty

<sup>j</sup> Low-dose FGIP includes electrophysiology diagnostic studies, electrophysiology ablations, peripherally inserted central catheter placement, port placement, inferior vena cava filter placement, endoscopic retrograde cholangiopancreatography, and orthopedic extremity nailing

<sup>k</sup> High-dose FGIP includes diagnostic cardiovascular catheterizations, diagnostic neuroangiography, percutaneous coronary interventions, pacemaker or intracardiac defibrillator implantations, embolizations, endovascular therapeutic procedures, dialysis interventions, peripheral vascular interventions, transjugular intrahepatic portosystemic shunts, aortic stent grafts, percutaneous nephrolithotomy, nephrostomy, biliary tract procedures, and vertebroplasty

<sup>l</sup> likelihood-based confidence bounds

**Supplemental Table 4 FGIP work history and cataract and cataract surgery risk, stratified by sex, United States Radiologic Technologists Study, 1994-2014, (N=35,751)**

| Cumulative FGIP (1970-2009) | Total procedures |         |                 |           | Procedures >3 feet from the patient |         |                   |           | Procedures ≤3 feet from the patient |         |                   |           |
|-----------------------------|------------------|---------|-----------------|-----------|-------------------------------------|---------|-------------------|-----------|-------------------------------------|---------|-------------------|-----------|
|                             | Cases            | PYR     | RR <sup>a</sup> | 95% CI    | Cases                               | PYR     | RR <sup>a,b</sup> | 95% CI    | Cases                               | PYR     | RR <sup>a,c</sup> | 95% CI    |
| <b>Cataract</b>             |                  |         |                 |           |                                     |         |                   |           |                                     |         |                   |           |
| <b>Women</b>                |                  |         |                 |           |                                     |         |                   |           |                                     |         |                   |           |
| Never worked with FGIP      | 6,738            | 379,615 | ref             | ref       | 6,738                               | 379,615 | ref               | ref       | 6,738                               | 379,615 | ref               | ref       |
| 0-<3,000                    | 656              | 50,154  | 1.14            | 1.05-1.24 | 831                                 | 61,089  | 1.16              | 1.07-1.25 | 832                                 | 61,357  | 1.17              | 1.08-1.26 |
| ≥3,000                      | 370              | 23,637  | 1.42            | 1.27-1.57 | 195                                 | 12,702  | 1.17              | 0.99-1.37 | 194                                 | 12,434  | 1.38              | 1.18-1.63 |
| p-trend <sup>d</sup>        |                  |         |                 | <0.001    |                                     |         |                   | 0.03      |                                     |         |                   | <0.001    |
| <b>Men</b>                  |                  |         |                 |           |                                     |         |                   |           |                                     |         |                   |           |
| Never worked with FGIP      | 1,243            | 70,117  | ref             | ref       | 1,243                               | 70,117  | ref               | ref       | 1,243                               | 70,117  | ref               | ref       |
| 0-<3,000                    | 202              | 13,489  | 1.10            | 0.95-1.28 | 267                                 | 17,171  | 1.14              | 0.99-1.31 | 282                                 | 19,212  | 1.11              | 0.97-1.28 |
| ≥3,000                      | 163              | 10,629  | 1.27            | 1.08-1.50 | 98                                  | 6,948   | 1.02              | 0.81-1.29 | 83                                  | 4,907   | 1.52              | 1.17-1.96 |
| p-trend <sup>d</sup>        |                  |         |                 | 0.02      |                                     |         |                   | >0.50     |                                     |         |                   | 0.02      |
| <b>Cataract Surgery</b>     |                  |         |                 |           |                                     |         |                   |           |                                     |         |                   |           |
| <b>Women</b>                |                  |         |                 |           |                                     |         |                   |           |                                     |         |                   |           |
| Never worked with FGIP      | 3,111            | 398,786 | ref             | ref       | 3,111                               | 398,786 | ref               | ref       | 3,111                               | 398,786 | ref               | ref       |
| 0-<3,000                    | 228              | 52,169  | 0.94            | 0.82-1.08 | 292                                 | 63,619  | 0.98              | 0.86-1.12 | 292                                 | 63,892  | 0.97              | 0.86-1.11 |
| ≥3,000                      | 128              | 24,790  | 1.17            | 0.98-1.40 | 64                                  | 13,340  | 0.94              | 0.72-1.24 | 64                                  | 13,066  | 1.12              | 0.85-1.48 |
| p-trend <sup>d</sup>        |                  |         |                 | 0.16      |                                     |         |                   | >0.50     |                                     |         |                   | 0.25      |
| <b>Men</b>                  |                  |         |                 |           |                                     |         |                   |           |                                     |         |                   |           |
| Never worked with FGIP      | 652              | 73,312  | ref             | ref       | 652                                 | 73,312  | ref               | ref       | 652                                 | 73,312  | ref               | ref       |
| 0-<3,000                    | 96               | 14,035  | 1.02            | 0.82-1.26 | 124                                 | 17,893  | 1.02              | 0.83-1.25 | 124                                 | 19,961  | 0.97              | 0.80-1.19 |
| ≥3,000                      | 63               | 11,119  | 0.95            | 0.73-1.23 | 35                                  | 7,262   | 0.67              | 0.46-0.98 | 35                                  | 5,144   | 1.33              | 0.91-1.96 |
| p-trend <sup>d</sup>        |                  |         |                 | >0.50     |                                     |         |                   | 0.21      |                                     |         |                   | 0.15      |

<sup>a</sup> Adjusted for attained age with stratification of sex and FGIP work history in a person-year table categorized as 0, 500, 1000-10,000 [intervals of 1,000 procedures], 10,000+

<sup>b</sup> Adjusted for cumulative procedures ≤3 feet

<sup>c</sup> Adjusted for cumulative procedures >3 feet

<sup>d</sup> Based on the likelihood ratio test for the continuous term

**Supplemental Table 5 FGIP work history and cataract surgery risk, United States Radiologic Technologists Study, 1994-2014, (N=35,751)**

| Cumulative FGIP (1970-2009)           | Total procedures |         |                 |           | Procedures >3 feet from the patient |         |                   |           | Procedures ≤3 feet from the patient |         |                   |           |
|---------------------------------------|------------------|---------|-----------------|-----------|-------------------------------------|---------|-------------------|-----------|-------------------------------------|---------|-------------------|-----------|
|                                       | Cases            | PYR     | RR <sup>a</sup> | 95% CI    | Cases                               | PYR     | RR <sup>a,b</sup> | 95% CI    | Cases                               | PYR     | RR <sup>a,c</sup> | 95% CI    |
| <b>Any FGIP</b>                       |                  |         |                 |           |                                     |         |                   |           |                                     |         |                   |           |
| Never worked with FGIP                | 3,763            | 472,090 | ref             | ref       | 3,763                               | 472,090 | ref               | ref       | 3,763                               | 472,090 | ref               | ref       |
| 0-<1,000                              | 223              | 43,035  | 0.96            | 0.84-1.10 | 316                                 | 61,517  | 0.98              | 0.87-1.11 | 336                                 | 67,421  | 0.95              | 0.85-1.07 |
| 1,000-<3,000                          | 101              | 23,168  | 0.94            | 0.77-1.14 | 100                                 | 19,993  | 0.98              | 0.80-1.20 | 80                                  | 16,430  | 1.07              | 0.85-1.35 |
| 3,000-<5,000                          | 56               | 11,135  | 1.05            | 0.80-1.37 | 36                                  | 7,944   | 0.78              | 0.55-1.09 | 32                                  | 6,851   | 1.10              | 0.77-1.58 |
| ≥5,000                                | 135              | 24,773  | 1.08            | 0.91-1.28 | 63                                  | 12,657  | 0.85              | 0.65-1.11 | 67                                  | 11,409  | 1.26              | 0.97-1.63 |
| p-trend <sup>l</sup>                  |                  |         |                 | 0.45      |                                     |         |                   | 0.40      |                                     |         |                   | 0.10      |
| <b>Diagnostic FGIP<sup>d,h</sup></b>  |                  |         |                 |           |                                     |         |                   |           |                                     |         |                   |           |
| Never worked with FGIP                | 3,763            | 472,090 | ref             | ref       | 3,763                               | 472,090 | ref               | ref       | 3,763                               | 472,090 | ref               | ref       |
| 0-<1,000                              | 350              | 69,196  | 0.99            | 0.88-1.11 | 415                                 | 81,625  | 0.99              | 0.88-1.11 | 419                                 | 82,757  | 0.99              | 0.89-1.11 |
| 1,000-<3,000                          | 69               | 16,350  | 0.88            | 0.69-1.13 | 60                                  | 12,533  | 0.83              | 0.63-1.09 | 34                                  | 10,600  | 0.76              | 0.53-1.08 |
| 3,000-<5,000                          | 32               | 6,119   | 1.09            | 0.76-1.56 | 17                                  | 3,715   | 0.85              | 0.52-1.41 | 24                                  | 3,763   | 1.35              | 0.88-2.06 |
| ≥5,000                                | 64               | 10,445  | 1.28            | 0.98-1.68 | 23                                  | 4,238   | 0.91              | 0.58-1.43 | 38                                  | 4,990   | 1.57              | 1.10-2.23 |
| p-trend <sup>l</sup>                  |                  |         |                 | 0.11      |                                     |         |                   | >0.50     |                                     |         |                   | 0.04      |
| <b>Therapeutic FGIP<sup>e,i</sup></b> |                  |         |                 |           |                                     |         |                   |           |                                     |         |                   |           |
| Never worked with FGIP                | 3,763            | 472,090 | ref             | ref       | 3,763                               | 472,090 | ref               | ref       | 3,763                               | 472,090 | ref               | ref       |
| 0-<1,000                              | 295              | 59,355  | 0.93            | 0.82-1.05 | 370                                 | 72,901  | 0.97              | 0.86-1.09 | 395                                 | 79,744  | 0.94              | 0.85-1.06 |
| 1,000-<3,000                          | 91               | 19,219  | 1.02            | 0.82-1.26 | 80                                  | 16,171  | 0.99              | 0.78-1.25 | 64                                  | 12,529  | 1.12              | 0.86-1.47 |
| 3,000-<5,000                          | 53               | 9,421   | 1.10            | 0.83-1.45 | 36                                  | 6,143   | 0.95              | 0.67-1.34 | 26                                  | 4,722   | 1.31              | 0.87-1.96 |
| ≥5,000                                | 76               | 14,117  | 0.96            | 0.75-1.23 | 29                                  | 6,896   | 0.68              | 0.46-1.01 | 30                                  | 5,117   | 1.08              | 0.73-1.58 |
| p-trend <sup>l</sup>                  |                  |         |                 | 0.37      |                                     |         |                   | >0.50     |                                     |         |                   | >0.50     |
| <b>Low-dose FGIP<sup>f,j</sup></b>    |                  |         |                 |           |                                     |         |                   |           |                                     |         |                   |           |
| Never worked with FGIP                | 3,763            | 472,090 | ref             | ref       | 3,763                               | 472,090 | ref               | ref       | 3,763                               | 472,090 | ref               | ref       |
| 0-<1,000                              | 357              | 74,554  | 0.94            | 0.83-1.05 | 423                                 | 84,797  | 0.98              | 0.88-1.10 | 456                                 | 90,270  | 0.97              | 0.87-1.08 |
| 1,000-<3,000                          | 105              | 17,332  | 1.14            | 0.92-1.40 | 68                                  | 12,231  | 0.96              | 0.75-1.25 | 43                                  | 8,395   | 0.98              | 0.71-1.35 |
| 3,000-<5,000                          | 33               | 5,657   | 0.97            | 0.68-1.40 | 11                                  | 3,086   | 0.57              | 0.31-1.04 | 12                                  | 2,080   | 1.03              | 0.57-1.85 |
| ≥5,000                                | 20               | 4,569   | 0.66            | 0.41-1.06 | 13                                  | 1,998   | 0.96              | 0.54-1.70 | 4                                   | 1,367   | 0.42              | 0.15-1.13 |
| p-trend <sup>l</sup>                  |                  |         |                 | 0.16      |                                     |         |                   | >0.50     |                                     |         |                   | >0.50     |
| <b>High-dose FGIP<sup>g,k</sup></b>   |                  |         |                 |           |                                     |         |                   |           |                                     |         |                   |           |
| Never worked with FGIP                | 3,763            | 472,090 | ref             | ref       | 3,763                               | 472,090 | ref               | ref       | 3,763                               | 472,090 | ref               | ref       |
| 0-<1,000                              | 278              | 54,317  | 0.98            | 0.86-1.11 | 359                                 | 70,440  | 0.98              | 0.87-1.10 | 372                                 | 74,086  | 0.97              | 0.87-1.09 |
| 1,000-<3,000                          | 100              | 20,787  | 1.03            | 0.84-1.26 | 87                                  | 17,032  | 0.96              | 0.76-1.21 | 59                                  | 13,958  | 1.01              | 0.77-1.32 |
| 3,000-<5,000                          | 41               | 9,203   | 0.99            | 0.72-1.35 | 27                                  | 5,850   | 0.78              | 0.52-1.16 | 28                                  | 5,452   | 1.22              | 0.83-1.80 |
| ≥5,000                                | 96               | 17,905  | 1.14            | 0.91-1.43 | 42                                  | 8,789   | 0.83              | 0.58-1.17 | 56                                  | 8,616   | 1.46              | 1.09-1.95 |
| p-trend <sup>l</sup>                  |                  |         |                 | 0.15      |                                     |         |                   | >0.50     |                                     |         |                   | 0.03      |

Abbreviations: FGIP – fluoroscopically-guided interventional procedures, PYR – person-years at risk, RR – relative risk, CI – confidence interval, ref – referent group

<sup>a</sup> Adjusted for attained age and sex with stratification of FGIP work history in a person-year table categorized as 0, 500, 1000-10,000 [intervals of 1,000 procedures], 10,000+

<sup>b</sup> Adjusted for cumulative procedures ≤3 feet

<sup>c</sup> Adjusted for cumulative procedures >3 feet

<sup>d</sup> Adjusted for cumulative therapeutic FGIP work history

<sup>e</sup>Adjusted for cumulative diagnostic FGIP work history

<sup>f</sup>Adjusted for cumulative high-dose FGIP work history

<sup>g</sup>Adjusted for cumulative low-dose FGIP work history

<sup>h</sup>Diagnostic FGIP includes electrophysiology diagnostic studies, diagnostic cardiovascular catheterizations, and diagnostic neuroangiography

<sup>i</sup>Therapeutic FGIP includes electrophysiology ablations, peripherally inserted central catheter placement, port placement, inferior vena cava filter placement, endoscopic retrograde cholangiopancreatography, orthopedic extremity nailing, percutaneous coronary interventions, pacemaker or intracardiac defibrillator implantations, embolizations, endovascular therapeutic procedures, dialysis interventions, peripheral vascular interventions, transjugular intrahepatic portosystemic shunts, aortic stent grafts, percutaneous nephrolithotomy, nephrostomy, biliary tract procedures, and vertebroplasty

<sup>j</sup>Low-dose FGIP includes electrophysiology diagnostic studies, electrophysiology ablations, peripherally inserted central catheter placement, port placement, inferior vena cava filter placement, endoscopic retrograde cholangiopancreatography, and orthopedic extremity nailing

<sup>k</sup>High-dose FGIP includes diagnostic cardiovascular catheterizations, diagnostic neuroangiography, percutaneous coronary interventions, pacemaker or intracardiac defibrillator implantations, embolizations, endovascular therapeutic procedures, dialysis interventions, peripheral vascular interventions, transjugular intrahepatic portosystemic shunts, aortic stent grafts, percutaneous nephrolithotomy, nephrostomy, biliary tract procedures, and vertebroplasty

<sup>l</sup>Based on the likelihood ratio test for the continuous term

**Supplemental Table 6 Excess Relative Risk (ERR) of cataract surgery per 1,000 FGIP, United States Radiologic Technologists Study, 1994-2014, (N=35,751)**

| Cumulative FGIP (1970-2009)           | Total procedures |                     | Procedures >3 feet from the patient |                     | Procedures ≤3 feet from the patient |                     |
|---------------------------------------|------------------|---------------------|-------------------------------------|---------------------|-------------------------------------|---------------------|
|                                       | ERR <sup>a</sup> | 95% CI <sup>l</sup> | ERR <sup>a,b</sup>                  | 95% CI <sup>l</sup> | ERR <sup>a,c</sup>                  | 95% CI <sup>l</sup> |
| <b>Any FGIP</b>                       | 0.004            | -0.007-0.018        | -0.008                              | -0.025-0.012        | 0.019                               | -0.002-0.046        |
| <b>Diagnostic FGIP<sup>d,h</sup></b>  | 0.020            | -0.003-0.047        | -0.004                              | -0.037-0.038        | 0.041                               | 0.002-0.090         |
| <b>Therapeutic FGIP<sup>e,i</sup></b> | -0.009           | -0.025-0.012        | -0.009                              | -0.031-0.021        | -0.007                              | -0.047-0.040        |
| <b>Low-dose FGIP<sup>f,j</sup></b>    | -0.024           | -0.041-0.020        | 0.006                               | -0.003-0.02         | -0.036                              | -0.036-0.045        |
| <b>High-dose FGIP<sup>g,k</sup></b>   | 0.013            | 0.012-0.020         | -0.011                              | -0.019-0.005        | 0.027                               | 0.025-0.029         |

Abbreviations: FGIP- fluoroscopically-guided interventional procedures, ERR-excess relative risk, CI-confidence interval

<sup>a</sup> Adjusted for attained age and sex in a person-year table categorized as 0, 500, 1000-10,000 [intervals of 1,000 procedures], 10,000+

<sup>b</sup> Adjusted for cumulative procedures ≤3 feet

<sup>c</sup> Adjusted for cumulative procedures >3 feet

<sup>d</sup> Adjusted for cumulative therapeutic FGIP work history

<sup>e</sup> Adjusted for cumulative diagnostic FGIP work history

<sup>f</sup> Adjusted for cumulative high-dose FGIP work history

<sup>g</sup> Adjusted for cumulative low-dose FGIP work history

<sup>h</sup> Diagnostic FGIP includes electrophysiology diagnostic studies, diagnostic cardiovascular catheterizations, and diagnostic neuroangiography

<sup>i</sup> Therapeutic FGIP includes electrophysiology ablations, peripherally inserted central catheter placement, port placement, inferior vena cava filter placement, endoscopic retrograde cholangiopancreatography, orthopedic extremity nailing, percutaneous coronary interventions, pacemaker or intracardiac defibrillator implantations, embolizations, endovascular therapeutic procedures, dialysis interventions, peripheral vascular interventions, transjugular intrahepatic portosystemic shunts, aortic stent grafts, percutaneous nephrolithotomy, nephrostomy, biliary tract procedures, and vertebroplasty

<sup>j</sup> Low-dose FGIP includes electrophysiology diagnostic studies, electrophysiology ablations, peripherally inserted central catheter placement, port placement, inferior vena cava filter placement, endoscopic retrograde cholangiopancreatography, and orthopedic extremity nailing

<sup>k</sup> High-dose FGIP includes diagnostic cardiovascular catheterizations, diagnostic neuroangiography, percutaneous coronary interventions, pacemaker or intracardiac defibrillator implantations, embolizations, endovascular therapeutic procedures, dialysis interventions, peripheral vascular interventions, transjugular intrahepatic portosystemic shunts, aortic stent grafts, percutaneous nephrolithotomy, nephrostomy, biliary tract procedures, and vertebroplasty

<sup>l</sup> likelihood-based confidence bounds



**Supplementary Table 7 Epidemiologic studies examining cataract risk in medical workers exposed to low-dose ionizing radiation from FGIP<sup>a</sup>**

| First Author, Year, Study Location                             | Design               | Study Population                                                        | Baseline participant age (mean±SD)                 | Exposure Assessment | Outcome Ascertainment                                               | Effect Estimate (95% CI)                                                                         |
|----------------------------------------------------------------|----------------------|-------------------------------------------------------------------------|----------------------------------------------------|---------------------|---------------------------------------------------------------------|--------------------------------------------------------------------------------------------------|
| <b>Velazquez-Kronen, 2018, USA (current study)<sup>b</sup></b> | Retrospective cohort | 35,751 radiologic technologists (6,262 ever FGIP and 29,489 never FGIP) | Ever FGIP: 44±6<br>Never FGIP: 53±8                | Self-reported       | Self-reported                                                       | RR (ever FGIP/never FGIP): 1.18 (1.11-1.25)<br><br>RR (5,000+ FGIP/never FGIP): 1.38 (1.24-1.53) |
| <b>Vano<sup>27</sup>, 2010, Columbia, Uruguay<sup>c</sup></b>  | Cross-sectional      | 58 IC, 58 support staff, and 93 unexposed non-medical workers           | IC:46±8<br>Support staff: 38±7<br>Unexposed: 41±10 | Self-reported       | Slit-lamp examination using a modified Merriam-Focht scoring system | RR:<br>IC: 3.20 (1.70-6.10)<br>Support staff: 1.70 (0.80-3.70)                                   |
| <b>Jacob<sup>28</sup>, 2013, France<sup>c</sup></b>            | Cross-sectional      | 106 IC and 99 unexposed non-medical workers                             | IC: 51±7<br>Unexposed: 50±7                        | Self-reported       | Slit-lamp examination using LOCS-III grading                        | OR:<br>3.85 (1.30-11.40)                                                                         |
| <b>Andreassi<sup>29</sup>, 2016, Italy<sup>b</sup></b>         | Cross-sectional      | 466 exposed medical workers and 280 unexposed professionals             | Exposed: 44±9<br>Unexposed: 43±7                   | Self-reported       | Self-reported                                                       | OR:<br>6.30 (1.50-27.60)                                                                         |
| <b>Karatasakis<sup>30</sup>, 2017, USA<sup>d</sup></b>         | Cross-sectional      | 99 exposed and 18 unexposed ICs and support staff                       | Exposed: 49±11<br>Unexposed: 39±12                 | Self-reported       | Slit-lamp examination a modified Merriam-Focht scoring system       | OR:<br>6.07 (1.38-43.45)                                                                         |

Abbreviations: FGIP- fluoroscopically-guided interventional procedures, IC – interventional cardiologists, cath-lab – catheterization laboratory, RR-relative risk, OR-odds ratio, CI – confidence interval

<sup>a</sup> Restricted to studies with sample size ≥100

<sup>b</sup> Risk estimate for any cataract

<sup>c</sup> Risk estimate for posterior subcapsular cataract

<sup>d</sup> Risk estimate for posterior subcapsular/cortical cataract combined

**Supplemental Table 8 Cumulative lens absorbed dose and badge dose by cumulative FGIP performed for technologists who ever worked with FGIP, United States Radiologic Technologists Study, 1980-1997, (n=6,626)**

|                                           | Mean cumulative lens dose (mGy) | Mean cumulative badge dose (mGy) |
|-------------------------------------------|---------------------------------|----------------------------------|
| <b>Total times assisted with any FGIP</b> |                                 |                                  |
| 0-<1,000                                  | 46.21                           | 36.08                            |
| 1,000-<3,000                              | 48.50                           | 42.48                            |
| 3,000-<5,000                              | 56.14                           | 47.91                            |
| 5,000+                                    | 61.19                           | 55.79                            |

Abbreviations: FGIP – fluoroscopically-guided interventional procedures, mGy – milligray

## REFERENCES

1. Padovani R, Vano E, Trianni A, et al. Reference levels at European level for cardiac interventional procedures. *Radiation Protection Dosimetry*. 2008;129(1-3):104-107.
2. Efsthathopoulos EP, Katritsis DG, Kottou S, et al. Patient and staff radiation dosimetry during cardiac electrophysiology studies and catheter ablation procedures: a comprehensive analysis. *Europace : European pacing, arrhythmias, and cardiac electrophysiology : journal of the working groups on cardiac pacing, arrhythmias, and cardiac cellular electrophysiology of the European Society of Cardiology*. 2006;8(6):443-448.
3. Heilmaier C, Niklaus Z, Berthold C, Kara L, Weishaupt D. Improving Patient Safety: Implementing Dose Monitoring Software in Fluoroscopically Guided Interventions. *Journal of vascular and interventional radiology : JVIR*. 2015;26(11):1699-1709.
4. Heilmaier C, Zuber N, Berthold C, Kara L, Weishaupt D. Establishing Local Diagnostic Reference Levels in IR Procedures with Dose Management Software. *Journal of vascular and interventional radiology : JVIR*. 2017;28(3):429-441.
5. Fletcher DW, Miller DL, Balter S, Taylor MA. Comparison of four techniques to estimate radiation dose to skin during angiographic and interventional radiology procedures. *Journal of vascular and interventional radiology : JVIR*. 2002;13(4):391-397.
6. Dauer LT, Thornton R, Erdi Y, et al. Estimating radiation doses to the skin from interventional radiology procedures for a patient population with cancer. *Journal of vascular and interventional radiology : JVIR*. 2009;20(6):782-788; quiz 789.
7. Buls N, Pages J, Mana F, Osteaux M. Patient and staff exposure during endoscopic retrograde cholangiopancreatography. *Br J Radiol*. 2002;75(893):435-443.
8. Kirousis G, Delis H, Megas P, Lambiris E, Panayiotakis G. Dosimetry during intramedullary nailing of the tibia: Patient and occupational exposure. *Acta Orthopaedica*. 2009;80(5):568-572.
9. Pillai A, Jain M. Dose area product measurement in orthopaedic trauma: An attempt at establishing a local diagnostic reference level. *Radiography*. 2004;10(2):103-107.
10. Tsapaki V, Kottou S, Vano E, et al. Patient dose values in a dedicated Greek cardiac centre. *The British Journal of Radiology*. 2003;76(910):726-730.
11. Neofotistou V, Vano E, Padovani R, et al. Preliminary reference levels in interventional cardiology. *European radiology*. 2003;13(10):2259-2263.
12. Miller DL, Hilohi CM, Spelic DC. Patient radiation doses in interventional cardiology in the U.S.: advisory data sets and possible initial values for U.S. reference levels. *Med Phys*. 2012;39(10):6276-6286.
13. Vano E, Järvinen H, Kosunen A, et al. Patient dose in interventional radiology: a European survey. *Radiation Protection Dosimetry*. 2008;129(1-3):39-45.
14. Ihn YK, Kim B-S, Byun JS, et al. Patient Radiation Exposure During Diagnostic and Therapeutic Procedures for Intracranial Aneurysms: A Multicenter Study. *Neurointervention*. 2016;11(2):78-85.
15. Balter S, Miller DL, Vano E, et al. A pilot study exploring the possibility of establishing guidance levels in x-ray directed interventional procedures. *Med Phys*. 2008;35(2):673-680.
16. Tsapaki V, Christou A, Spanodimos S, et al. Evaluation of radiation dose during pacemaker implantations. *Radiat Prot Dosimetry*. 2011;147(1-2):75-77.
17. Simantirakis G, Koukorava C, Kalathaki M, et al. Reference levels and patient doses in interventional cardiology procedures in Greece. *European radiology*. 2013;23(8):2324-2332.
18. Miller DL, Balter S, Cole PE, et al. Radiation Doses in Interventional Radiology Procedures: The RAD-IR Study Part I: Overall Measures of Dose. *Journal of Vascular and Interventional Radiology*. 2003;14(6):711-727.
19. Miller DL, Kwon D, Bonavia GH. Reference Levels for Patient Radiation Doses in Interventional Radiology: Proposed Initial Values for U.S. Practice. *Radiology*. 2009;253(3):753-764.

20. Kemerink GJ, Frantzen MJ, Oei K, et al. Patient and occupational dose in neurointerventional procedures. *Neuroradiology*. 2002;44(6):522-528.
21. Chun CW, Kim BS, Lee CH, Ihn YK, Shin YS. Patient radiation dose in diagnostic and interventional procedures for intracranial aneurysms: experience at a single center. *Korean journal of radiology*. 2014;15(6):844-849.
22. Vano E, Sanchez R, Fernandez JM, et al. Patient dose reference levels for interventional radiology: a national approach. *Cardiovasc Intervent Radiol*. 2009;32(1):19-24.
23. Heye S, Maleux G, Oyen RH, Claes K, Kuypers DRJ. Occupational Radiation Dose: Percutaneous Interventional Procedures on Hemodialysis Arteriovenous Fistulas and Grafts. *Radiology*. 2012;264(1):278-284.
24. Kuhelj D, Zdesar U, Jevtic V, et al. Risk of deterministic effects during endovascular aortic stent graft implantation. *Br J Radiol*. 2010;83(995):958-963.
25. Ruiz-Cruces R, Vano E, Carrera-Magariño F, et al. Diagnostic reference levels and complexity indices in interventional radiology: a national programme. *European radiology*. 2016;26(12):4268-4276.
26. Etard C, Bigand E, Salvat C, et al. Patient dose in interventional radiology: a multicentre study of the most frequent procedures in France. *European radiology*. 2017;27(10):4281-4290.
27. Vano E, Kleiman NJ, Duran A, Rehani MM, Echeverri D, Cabrera M. Radiation cataract risk in interventional cardiology personnel. *Radiat Res*. 2010;174(4):490-495.
28. Jacob S, Boveda S, Bar O, et al. Interventional cardiologists and risk of radiation-induced cataract: results of a French multicenter observational study. *International journal of cardiology*. 2013;167(5):1843-1847.
29. Andreassi MG, Piccaluga E, Guagliumi G, Del Greco M, Gaita F, Picano E. Occupational Health Risks in Cardiac Catheterization Laboratory Workers. *Circulation Cardiovascular interventions*. 2016;9(4):e003273.
30. Karatasakis A, Brilakis HS, Danek BA, et al. Radiation-associated lens changes in the cardiac catheterization laboratory: Results from the IC-CATARACT (CATaracts Attributed to RAdiation in the CaTh lab) study. *Catheter Cardiovasc Interv*. 2017.
